# Supplementary material
Source: publisher figshare collection journal article supplement (https://acs.figshare.com/ndownloader/files/4592404)
Supplement: Supplementary file 1 [file 4592404]

#######################################################################
#
#                 Cambridge Crystallographic Data Centre
#                                CCDC 
#
#######################################################################
#
# If this CIF has been generated directly or indirectly from an entry in the 
# Cambridge Structural Database, then it will include bibliographic, chemical, 
# crystal, experimental, refinement or atomic coordinate data resulting from 
# the CCDC's data processing and validation procedures. Files generated from 
# CSD entries are Copyright 2008 Cambridge Crystallographic Data Centre. They 
# may be used in bona fide research applications only, and may not be copied or 
# further disseminated in any form, whether machine-readable or not, except for 
# the purposes of generating routine backup copies on your local computer 
# system.
# 
# Files arising from any other source may also contain material that is the 
# copyright of third parties, including the originator, and you should check 
# with the originator concerning the permitted uses of the information 
# contained in this CIF.
#
# For further information on the CCDC and the free tools enCIFer and Mercury
# for validating and visualising CIF files, please visit www.ccdc.cam.ac.uk
#
#######################################################################

data_rt32
_symmetry_cell_setting           triclinic
_symmetry_space_group_name_H-M   'P -1'
_symmetry_Int_Tables_number      2
loop_
_symmetry_equiv_pos_site_id
_symmetry_equiv_pos_as_xyz
1 x,y,z
2 -x,-y,-z
_cell_length_a                   11.8855(6)
_cell_length_b                   12.0087(6)
_cell_length_c                   12.5758(7)
_cell_angle_alpha                67.226(2)
_cell_angle_beta                 82.592(2)
_cell_angle_gamma                81.482(2)
_cell_volume                     1631.69
loop_
_atom_site_label
_atom_site_type_symbol
_atom_site_fract_x
_atom_site_fract_y
_atom_site_fract_z
Fe1 Fe 0.23463(3) 0.01199(3) 0.28430(2)
O1 O 0.20321(12) -0.03648(13) 0.14954(12)
O2 O 0.36781(12) 0.02326(13) 0.15137(12)
N1 N 0.28791(13) -0.14443(13) 0.42578(13)
N2 N 0.16190(13) 0.04558(14) 0.42243(13)
N3 N 0.16328(13) 0.19999(14) 0.21644(13)
C1 C 0.27846(18) -0.25269(18) 0.63940(17)
H1A H 0.3081 -0.3248 0.6218
H1B H 0.2103 -0.2699 0.6935
H1C H 0.3368 -0.2313 0.6745
C2 C 0.24803(16) -0.14849(17) 0.52967(16)
C3 C 0.17562(16) -0.04134(17) 0.53139(16)
C4 C 0.12648(17) -0.01895(18) 0.62853(17)
C5 C 0.06506(19) 0.09209(19) 0.61663(18)
C6 C 0.05476(17) 0.18138(18) 0.50593(18)
C7 C 0.10471(16) 0.15697(17) 0.41105(16)
C8 C 0.10635(16) 0.24236(17) 0.29088(17)
C9 C 0.04681(18) 0.36842(17) 0.26010(18)
H9A H 0.0689 0.4173 0.1793
H9B H 0.0685 0.4053 0.3106
H9C H -0.0359 0.3652 0.2702
C10 C 0.36813(16) -0.23846(17) 0.40780(16)
C11 C 0.48541(17) -0.23056(18) 0.40504(17)
C12 C 0.56173(18) -0.3150(2) 0.37534(19)
C13 C 0.52430(19) -0.4058(2) 0.35062(19)
C14 C 0.40904(19) -0.41351(19) 0.35612(18)
C15 C 0.32908(17) -0.33098(18) 0.38475(17)
C16 C 0.52913(18) -0.13241(19) 0.4329(2)
C17 C 0.5895(2) -0.0438(2) 0.3264(2)
H17A H 0.6148 0.0193 0.3462
H17B H 0.5367 -0.0061 0.2652
H17C H 0.6557 -0.0875 0.2991
C18 C 0.6062(2) -0.1869(2) 0.5322(2)
H18A H 0.5655 -0.2431 0.5998
H18B H 0.6280 -0.1218 0.5515
H18C H 0.6750 -0.2309 0.5091
C19 C 0.20241(18) -0.34260(19) 0.3919(2)
C20 C 0.1647(2) -0.3361(2) 0.2788(2)
H20A H 0.1826 -0.2592 0.2171
H20B H 0.0822 -0.3408 0.2866
H20C H 0.2048 -0.4040 0.2595
C21 C 0.17167(19) -0.4593(2) 0.4906(2)
H21A H 0.2120 -0.5295 0.4752
H21B H 0.0892 -0.4630 0.4967
H21C H 0.1941 -0.4603 0.5633
C22 C 0.17428(17) 0.27096(17) 0.09472(17)
C23 C 0.08552(17) 0.28595(17) 0.02557(17)
C24 C 0.10574(19) 0.34350(19) -0.09420(18)
C25 C 0.2093(2) 0.3853(2) -0.14274(19)
C26 C 0.2950(2) 0.3715(2) -0.0730(2)
C27 C 0.28072(18) 0.31379(18) 0.04658(18)
C28 C -0.02974(18) 0.2398(2) 0.07524(18)
C29 C -0.12890(19) 0.3380(2) 0.0361(2)
H29A H -0.1191 0.4065 0.0569
H29B H -0.2006 0.3049 0.0742
H29C H -0.1310 0.3658 -0.0479
C30 C -0.0436(2) 0.1304(2) 0.0456(2)
H30A H -0.0447 0.1561 -0.0384
H30B H -0.1154 0.0975 0.0836
H30C H 0.0204 0.0676 0.0726
C31 C 0.37455(19) 0.3017(2) 0.12202(19)
C32 C 0.3643(2) 0.4131(2) 0.1545(2)
H32A H 0.3675 0.4864 0.0840
H32B H 0.4273 0.4060 0.2007
H32C H 0.2915 0.4183 0.1997
C33 C 0.49417(19) 0.2784(2) 0.0684(2)
H33A H 0.4972 0.2092 0.0448
H33B H 0.5499 0.2604 0.1255
H33C H 0.5121 0.3507 0.0007
C34 C 0.3000(2) -0.0046(2) 0.09924(19)
C35 C 0.3288(2) 0.0071(3) -0.0249(2)
H35A H 0.2882 0.0820 -0.0762
H35B H 0.3058 -0.0629 -0.0353
H35C H 0.4112 0.0098 -0.0438
H28 H -0.0295(15) 0.2115(15) 0.1620(15)
H14 H 0.3861(17) -0.4802(19) 0.3427(17)
H31 H 0.3659(16) 0.2304(17) 0.1940(16)
H5 H 0.0324(15) 0.1041(16) 0.6822(16)
H25 H 0.2175(16) 0.4247(17) -0.2253(17)
H26 H 0.3581(16) 0.4006(17) -0.1016(16)
H6 H 0.0173(17) 0.2591(19) 0.4985(17)
H24 H 0.0463(17) 0.3492(18) -0.1393(17)
H12 H 0.6435(17) -0.3116(17) 0.3719(16)
H19 H 0.1656(16) -0.2783(17) 0.4042(16)
H16 H 0.4618(16) -0.0868(17) 0.4582(17)
H13 H 0.5783(16) -0.4641(17) 0.3328(16)
H4 H 0.1384(17) -0.0770(18) 0.7000(17)

#END
